# 1 **A chronic photocapacitor implant for noninvasive neurostimulation with deep red** 2 **light**

3  
4 Malin Silverå-Ejneby,<sup>1,2</sup> Marie Jakešová,<sup>1</sup> Jose J. Ferrero,<sup>3,4</sup> Ludovico Migliaccio,<sup>1,2</sup> Zifang  
5 Zhao,<sup>5</sup> Magnus Berggren,<sup>1</sup> Dion Khodagholy,<sup>5</sup> Vedran Đerek,<sup>1,2,6\*</sup> Jennifer Gelinás,<sup>3\*</sup> Eric  
6 Daniel Głowacki<sup>1,2\*</sup>

7  
8 <sup>1</sup> Laboratory of Organic Electronics, Campus Norrköping, Linköping University, SE-  
9 60174, Norrköping, Sweden

10 <sup>2</sup> Wallenberg Centre for Molecular Medicine, Linköping University, SE-58185, Linköping,  
11 Sweden

12 <sup>3</sup> Department of Neurology, Columbia University Medical Center, New York, NY 10032,  
13 USA.

14 <sup>4</sup> Institute for Genomic Medicine, Columbia University Medical Center, 630 West 168<sup>th</sup>  
15 Street, New York, NY 10032, USA.

16 <sup>5</sup> Department of Electrical Engineering, Columbia University, New York, NY 10027, USA.

17 <sup>6</sup> Department of Physics, Faculty of Science, University of Zagreb, Bijenička c. 32, 10000,  
18 Zagreb, Croatia

19  
20

21 **Abstract:** Implantable clinical neuroelectronic devices are limited by a lack of reliable, safe,  
22 and minimally invasive methods to wirelessly modulate neural tissue. Here, we address  
23 this challenge by using organic electrolytic photocapacitors (OEPCs) to perform chronic  
24 peripheral nerve stimulation via transduction of tissue-penetrating deep-red light into  
25 electrical signals. The operating principle of the OEPC relies on efficient charge generation  
26 by nanoscale organic semiconductors comprising nontoxic commercial pigments. OEPCs  
27 integrated on an ultrathin cuff are implanted, and light impulses at wavelengths in the tissue  
28 transparency window are used to stimulate from outside of the body. Typical stimulation  
29 parameters involve irradiation with pulses of 50-1000  $\mu$ s length (638 or 660 nm), capable  
30 of actuating the implant about 10 mm below the skin. We detail how to benchmark  
31 performance parameters of OEPCs first *ex vivo*, and *in vivo* using a rat sciatic nerve.  
32 Incorporation of a microfabricated zip-tie mechanism enabled stable, long-term nerve  
33 implantation of OEPC devices in rats, with sustained ability to non-invasively mediate  
34 neurostimulation over 100 days. OEPC devices introduce a high performance, ultralow  
35 volume (0.1 mm<sup>3</sup>), biocompatible approach to wireless neuromodulation, with potential  
36 applicability to an array of clinical bioelectronics.

37

## 38 **Introduction**

39 Implantable neural interfaces are at the heart of bioelectronic medicine, a growing field  
40 which aims to provide electrical solutions to medical problems<sup>1-3</sup>. Direct electrical  
41 actuation of the nervous system is utilized clinically in deep brain stimulation<sup>4</sup>, prosthetic  
42 retina implants<sup>5</sup>, vagus nerve stimulation for treatment of epilepsy<sup>6</sup> and other disorders<sup>7,8</sup>,  
43 as well as numerous other applications. Meanwhile, the list of emerging technologies at a  
44 preclinical phase is constantly growing<sup>9,10</sup>. Several fundamental engineering hurdles need  
45 to be overcome to facilitate widespread implementation of bioelectronic devices and ensure  
46 optimal clinical outcomes<sup>11,12</sup>. A key challenge is to improve long-term powering and

1 miniaturization of implantable devices, motivating exploration of methods to wirelessly  
2 actuate and control implants from outside of the body. The most common approaches  
3 involve radio frequency (RF) power transmission or electromagnetic induction<sup>13</sup>. Although  
4 these technologies are being developed for clinical use<sup>11,14-16</sup>, RF imposes size and shape  
5 constraints for transmitting and receiving components. The volume of the receiver  
6 (implanted inside the body) ranges from 30-600 mm<sup>3</sup>,<sup>17</sup> including antenna for RF  
7 transmission, electrodes for nerve stimulation, and device packaging for protection of rigid  
8 Si-based electronics from body fluids. Efficient RF coupling and tissue heating are also  
9 factors that limit clinical translation.<sup>17</sup> An alternative emerging approach leverages acoustic  
10 waves at ultrasound frequencies. Ultrasonic energy can be used to stimulate nervous tissue  
11 directly<sup>18</sup> or can be absorbed by piezoelectric transducers to power devices<sup>19</sup>. Though very  
12 promising, due to acoustic impedance matching requirements the ultrasound transmitter  
13 must be in intimate contact with the skin, and penetration through layers of different tissues  
14 can be a limitation of ultrasound technologies. Overall, there is a strong demand for fully  
15 implantable systems which require less anatomical space than the aforementioned  
16 approaches, and which are as noninvasive and easy to use as possible.

17  
18 In this work, we hypothesized that tissue-penetrating deep red light (620-800 nm)  
19 could effectively control implants wirelessly without requiring rigid or bulky implanted  
20 components. Three main features support this idea. Firstly, deep-red wavelengths occupy  
21 a “tissue transparency window” of the electromagnetic spectrum as they are neither  
22 absorbed by biopigments in the body nor by water. Therefore, unlike near-infrared  
23 radiation, they do not cause heating. Skin, muscle, and bone are all remarkably transparent  
24 to 620-800 nm light<sup>20</sup>. Next, light-emitting diode (LED) technologies are well established  
25 and mature. High brightness, efficient LEDs are reliable and commercially available in  
26 huge variety and at low-cost. Laser diodes give the additional advantage of low-divergence  
27 collimated beams that can target and deliver light through the tissue efficiently. Lastly,  
28 devices relying on optical power transfer can easily be made on the sub-millimeter scale  
29 (<1 mm<sup>3</sup>). Deep red light could therefore address the challenge of making small-scale  
30 devices that can be actuated and controlled wirelessly from outside the body.

31 The combination of an optoelectronic transducer implant and deep red light has  
32 been largely unexplored, with the notable exception of recent efforts to make light-  
33 powered/rechargeable pacemakers<sup>21,22</sup>. On the other hand, a variety of approaches in basic  
34 and biomedical research use light to mediate neurostimulation due to its noninvasiveness  
35 and versatility<sup>23-25</sup>. Optogenetics endows cells with light responsiveness<sup>26</sup>, but the  
36 necessity of genetic manipulation to accomplish this is not always facile or desirable for  
37 many applications, and remains a controversial proposition for clinical translation.  
38 Moreover, few opsins are available with light sensitivity in the red part of the spectrum<sup>27</sup>.  
39 These observations have spurred exploration of other ways to use light to interface with  
40 the nervous system over the past decade. Photothermal heating with light can be used  
41 directly to trigger a thermocapacitive effect, stimulating neurons *in vitro*<sup>28</sup>. To better  
42 control specificity and localization of this approach, light-absorbing nano or microparticles  
43 can be used as photothermal mediators<sup>29</sup>. Both inorganic<sup>30</sup> (primarily silicon)<sup>31</sup> and  
44 molecular<sup>32</sup> or polymeric<sup>33</sup> semiconductors can be used as light absorbers for various *in*  
45 *vitro* stimulation demonstrations. Nanoscale silicon biointerfaces can be tuned to provide  
46 highly-localized photocurrent stimulation in single cells<sup>25</sup>. Few of these concepts have

1 proven scalable or reliable for *in vivo* settings, and chronic deployment remains elusive.  
2 To-date, photovoltaic neurostimulation has been developed for retinal prostheses, based on  
3 arrays of silicon<sup>34</sup> or organic semiconductors<sup>35</sup>. Highly optimized silicon diode-based  
4 technologies for retinal stimulation<sup>36,37</sup> have advanced to clinical trials. Delivery of light  
5 is straightforward for intraocular applications. Getting sufficient light to devices implanted  
6 below skin and other tissues, however, is not as obvious and thus photovoltaic implanted  
7 neurostimulators have not been made. We propose that using organic semiconductors as  
8 the active optoelectronic component could facilitate light-mediated neurostimulation for  
9 such applications<sup>38</sup> due to high absorbance coefficient, mechanical flexibility, and  
10 biocompatibility<sup>39</sup>. They can enable ultrathin and minimally invasive form factors  
11 inaccessible for traditional inorganic materials. Such approaches to noninvasive  
12 photostimulation of the nervous system *in vivo* have not yet been demonstrated.

13 Our biointerface devices use commercial organic pigments<sup>32,40</sup>, which belong to the  
14 category of safe and nontoxic colorants approved for a wide range of consumer products  
15 like food colorants and cosmetics<sup>41</sup>. These pigment materials form the basis of our recently  
16 developed organic electrolytic photocapacitor (OEPC)<sup>42</sup>. This device employs a  
17 nanocrystalline donor-acceptor PN junction acting as the charge-generating element and  
18 primary stimulation electrode, which is surrounded by a concentric return electrode. The  
19 stimulation efficacy of this minimalistic device architecture was validated for cultured  
20 neurons and explanted retinal tissues<sup>42</sup>. More recently, the capacitive charging behavior  
21 was characterized on the single-cell level, accompanied by direct electrophysiological  
22 measurement of the device's impact on voltage-gated ion channels<sup>43,44</sup>. These *in vitro*  
23 demonstrations were based on rigid OEPCs. Here we integrate the OEPC into an ultrathin  
24 flexible architecture suitable for chronic *in vivo* implantation. The photoelectrical charging  
25 behavior of the OEPC stimulation devices effectively activated the rat sciatic nerve *in vivo*  
26 and enabled precise control of stimulation by varying light intensity and pulse duration.  
27 We fabricated the OEPC into a self-locking ultrathin cuff that was simple to surgically  
28 place and immobilize inside a freely-moving animal over months. Deep red light delivered  
29 through the skin surface to the implanted OEPC evoked compound muscle action potentials  
30 (CMAPs) via sciatic nerve stimulation at an operation depth of 10-15 mm. Device  
31 implantation did not impede physiologic motor behaviors, and devices maintained their  
32 operation for up to 3 months after implantation. With a total volume of 0.1 mm<sup>3</sup>, OEPCs  
33 are the lowest-volume wireless peripheral nerve interface reported to-date<sup>17</sup>. These results  
34 suggest that OEPCs provide a viable approach to chronic *in vivo* neurostimulation, and  
35 hold potential for translation to clinical applications.

## 36 37 38 **Results**

### 39 40 ***Design and fabrication of flexible OEPC nerve stimulators***

41 Our approach to wireless neurostimulation leverages organic molecular thin-films to  
42 efficiently transduce light impulses into electrolytic currents that modulate activity of  
43 excitable cells. As in our *in vitro* studies leading up to the present work<sup>42,43</sup>, we rely on the  
44 phthalocyanine (H<sub>2</sub>Pc, P-type) / *N,N'*-dimethyl perylenetetracarboxylic bisimide / (PTCDI,  
45 N-type) heterojunction to create OEPCs (Figure 1a). The bilayer is deposited by thermal  
46 vacuum evaporation to form a densely-packed film of nanocrystals (Figure 1b). This PN

1 junction combination has high reliability and stability in aqueous environments. To  
2 transform the OEPC into an implantable device capable of efficiently delivering  
3 stimulation current, we integrated it into a ribbon-like structure that can conform around  
4 the nerve. We used thin (5  $\mu\text{m}$ ) parylene C, a well-established biocompatible polymer, as  
5 a substrate material<sup>45</sup>. The first design challenge we faced was producing a semitransparent  
6 conducting back electrode layer on the substrate. A key materials selection criterion is  
7 semitransparency of this underlying conductor, to allow light to reach the absorbing PN  
8 semiconductor layer. We utilized thin thermally-evaporated Au (10 nm thickness) due to  
9 its excellent conductivity, good transparency, and mechanical flexibility<sup>42</sup>. In the OEPC  
10 architecture, the back conductor functions as a return electrode, providing a termination of  
11 the current path generated by the PN junction. The PN junction, upon illumination, will  
12 produce an electrolytic double layer as electrons accumulate at the N-type  
13 material/electrolyte interface. Meanwhile, holes are driven into the underlying metallic  
14 conductor, creating an oppositely-charged double layer around the PN pixel thus giving  
15 rise to ionic currents around the device ( $I_{\text{ionic}}$ , Figure 1c). From the point of view of an  
16 underlying nerve, this device architecture produces a tripolar-type stimulating electrode  
17 arrangement (Figure 1c inset)<sup>12</sup>. These materials were integrated to ultimately fabricate  
18 chronically implantable photocapacitors (CIPs) for testing in an animal model. We placed  
19 these devices on rat sciatic nerve intra-operatively, and subsequently implanted them for  
20 long-term *in vivo* evaluation (Figure 1d). During chronic photostimulation, 638 nm light  
21 impulses would need to be beamed through about 10 mm of tissue to drive the CIP (Figure  
22 1e). We first sought to investigate the feasibility of this approach – can light be transmitted  
23 efficiently to reach a device located below the surface of the skin? Light propagation  
24 through different tissues has been studied in detail<sup>20</sup>. We applied established numerical  
25 Monte Carlo (MC) methods<sup>46,47</sup>, and used known optical constants for rat tissue<sup>48</sup> to  
26 determine that a conventional 700 mW laser diode at 638 nm will deliver light intensities  
27 in the range of tens of  $\text{mW}/\text{cm}^2$  at a depth of 1 cm (Figure 1f).

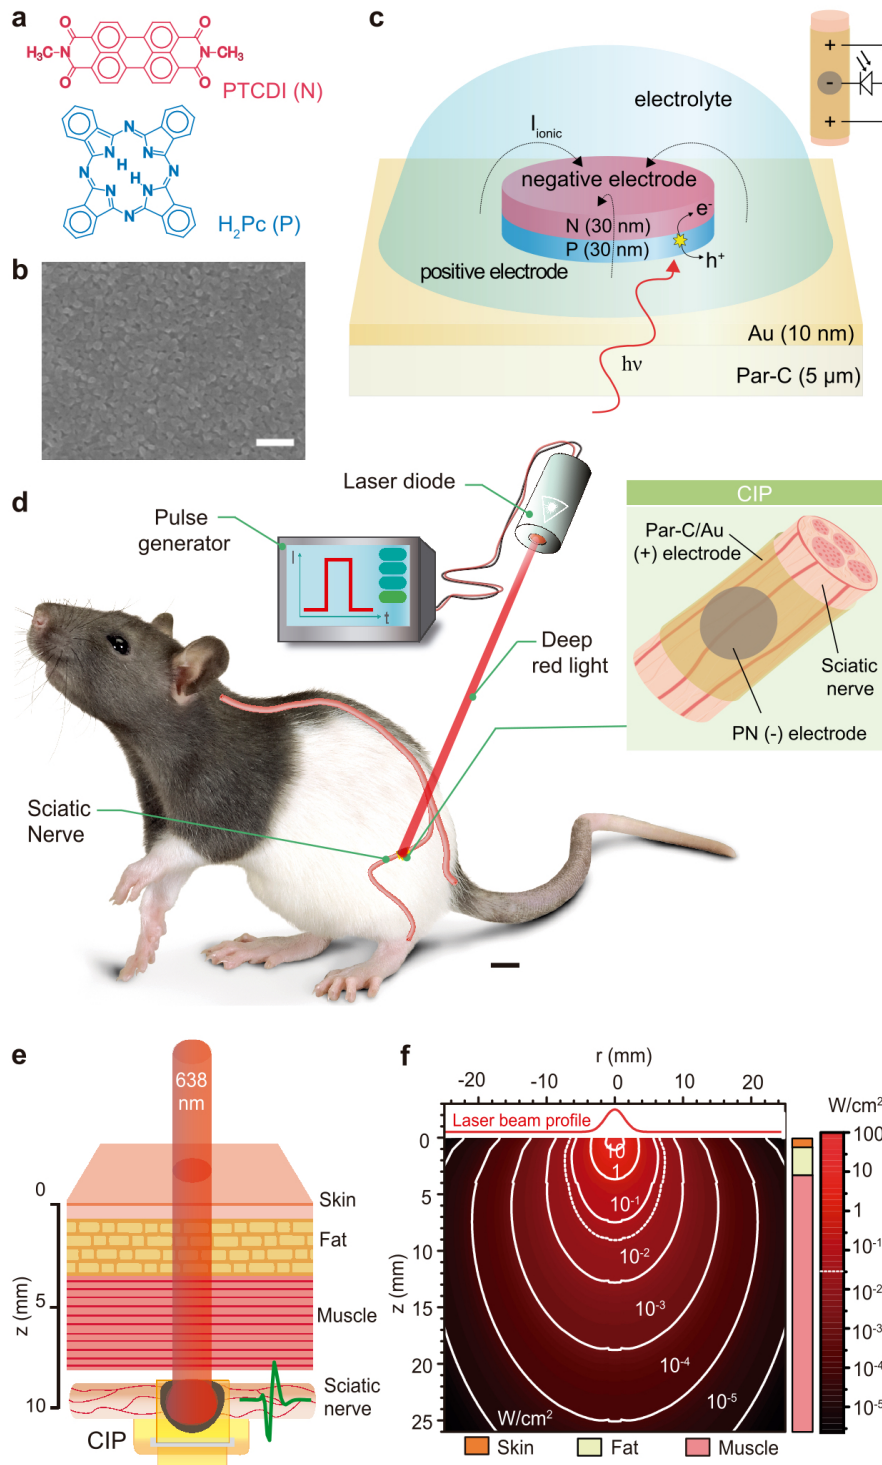

1  
 2 **Figure 1. | Organic electrolytic photocapacitors (OEPCs) wirelessly stimulate the**  
 3 **sciatic nerve *in vivo*.** **a**, Molecular structures of the active components in the PN  
 4 semiconducting layer. Phthalocyanine (H<sub>2</sub>Pc) functions as the light-absorbing and  
 5 electron-donating P-type layer. *N,N'*-dimethyl tetracarboxylic diimide (PTCDI) acts as the  
 6 electron-accepting N-type layer and forms an electrolytic contact with the surrounding  
 7 electrolyte. **b**, The sequentially evaporated PN bilayer (30+30 nm) forms a compact thin

1 film featuring a distinctive nanocrystalline morphology apparent in scanning electron  
2 microscopy. Scale bar 200 nm. **c**, Diagram of the OEPC device and its operating principle.  
3 The PN bilayer is processed on top of a semitransparent gold film (10 nm), which acts as  
4 the return (+) electrolytic contact. Light in the deep-red region (638 or 660 nm) is used for  
5 excitation of the P-type layer. Photogenerated electrons travel through the N layer to  
6 accumulate at the electrolyte interface, forming an electrolytic double layer. Concurrently,  
7 holes are driven from the P layer into the underlying gold, forming an oppositely-charged  
8 double layer. During charging of the device (beginning of light pulse), and discharging,  
9 (end of light pulse), ionic displacement currents (transient ionic current,  $I_{\text{ionic}}$ ) flow around  
10 the device and thus through surrounding tissue. This produces biphasic stimulation pulses.  
11 The inset shows how the OEPC, understood simply as an illuminated photodiode, couples  
12 to a nerve with a quasi-tripolar arrangement. **d**, Schematic of the *in vivo* implanted OEPC  
13 photostimulation experiments performed in this study. Scale bar 1 cm. The inset details  
14 how a chronically-implantable photocapacitor (CIP) cuff is placed around the nerve, with  
15 the configuration of the primary PN photoelectrode (-) with the surrounding (+) return  
16 electrode. **e**, Following implantation, deep red light penetrates through skin, fat, and muscle  
17 tissues to reach the OEPC, located at a depth of roughly 10 mm. **f**, Numerical calculation  
18 of penetration of a stimulating red light beam through simulated animal tissue layers,  
19 showing the effectiveness of 638 nm light to access the implanted OEPC. The dotted white  
20 line represents the cross-sectional region with 50 mW/cm<sup>2</sup> of intensity.

21

## 22 **Photoelectrical characterization**

23 While stimulation electrode benchmarking methods are well-established<sup>49</sup>, determining  
24 relevant parameters for an electrically-floating photoelectrode device requires special  
25 consideration. A common figure of merit for a neurostimulation electrode is the electrolytic  
26 charge density that the electrode can inject, or charge density per phase<sup>49</sup>. In order to  
27 measure this parameter in the case of OEPCs, we devised the electrophotoreponse (EPR)  
28 method<sup>43</sup> (Figure 2a). In EPR, the photovoltage or photocurrent is registered by contacting  
29 the back electrode (Au) with a probe and measuring versus an ideally nonpolarizable  
30 electrode (Ag/AgCl) immersed in an electrolyte. This electrolyte is confined to the top of  
31 the PN semiconductor region. The device is illuminated with light pulses from the bottom,  
32 through the semitransparent gold film, thus mimicking the anticipated configuration during  
33 *in vivo* neurostimulation. The photovoltage to which the PN/electrolyte junction charges  
34 can be measured using an oscilloscope. Photocurrent is quantified in the same arrangement  
35 using a current amplifier. During a light pulse of 638 or 660 nm, the OEPC charges to  
36 around 300-320 mV and the capacitive displacement currents under the same conditions  
37 peak at around 2 mA/cm<sup>2</sup> (Figure 2b). Dynamics are rapid, with full charging voltage  
38 achieved within 20  $\mu$ s. In the context of OEPC devices, charge density can be modulated  
39 with light intensity and light pulse length. We plot the charge density per phase as a  
40 function of light intensity (Figure 2c) and light pulse duration, from 50  $\mu$ s to 1 ms (Figure  
41 2d). The 638 nm wavelength was found to have slightly better photocharging efficiency  
42 relative to 660 nm. This finding corresponds to the absorption spectrum of the H<sub>2</sub>Pc p-type  
43 absorber layer<sup>42</sup>. Importantly, both wavelengths correspond to readily-available LED  
44 illuminators.

45 While the EPR measurement allows quantification of photocharge density which the OEPC  
46 device can generate, it does not faithfully reflect the final operating conditions of an OEPC

1 stimulator. *In vivo*, the OEPC device is electrically floating. The organic PN pixel forms  
2 an electrolytic closed circuit with the back electrode.<sup>42,50</sup> The displacement current which  
3 flows around the device during photocharging and discharging generates transient  
4 potentials in the solution which affect the electrophysiology of nearby cells, as established  
5 in our earlier *in vitro* studies<sup>43,44</sup>. To visualize this effect, we measure the transient potential  
6 ( $V_T$ ) above the PN pixel in electrolyte (Figure 2e). The  $V_T$  was registered between a  
7 recording microelectrode positioned at 1 mm above the center of the PN pixel versus a  
8 distant reference electrode. Consistent with the PN polarity of the OEPC, illumination  
9 resulted in a cathodic transient voltage peak followed by an anodic transient when the light  
10 was turned off and electronic charge carriers recombine (Figure 2f inset). This voltage  
11 transient corresponds temporally to the electrical perturbation that adjacent axon bodies  
12 will experience. It mimics a charge-balanced biphasic stimulation protocol, which is  
13 typically used to avoid tissue and electrode damage during neurostimulation<sup>51,52</sup>. The actual  
14 transmembrane potential induced will vary based on the position and distance from the  
15 stimulating electrode<sup>43,53</sup>. The magnitude of the  $V_T$  was directly proportional to the size of  
16 the PN pixel, ranging from around 8 mV for a 1 mm diameter PN pixel to 30-40 mV for a  
17 3 mm diameter pixel (Figure 2f). Taken together, these results demonstrate the operating  
18 mechanism and parameters for OEPC-mediated neural stimulation and highlight the  
19 importance of PN pixel size as a key parameter governing effectiveness of  
20 neuromodulation.

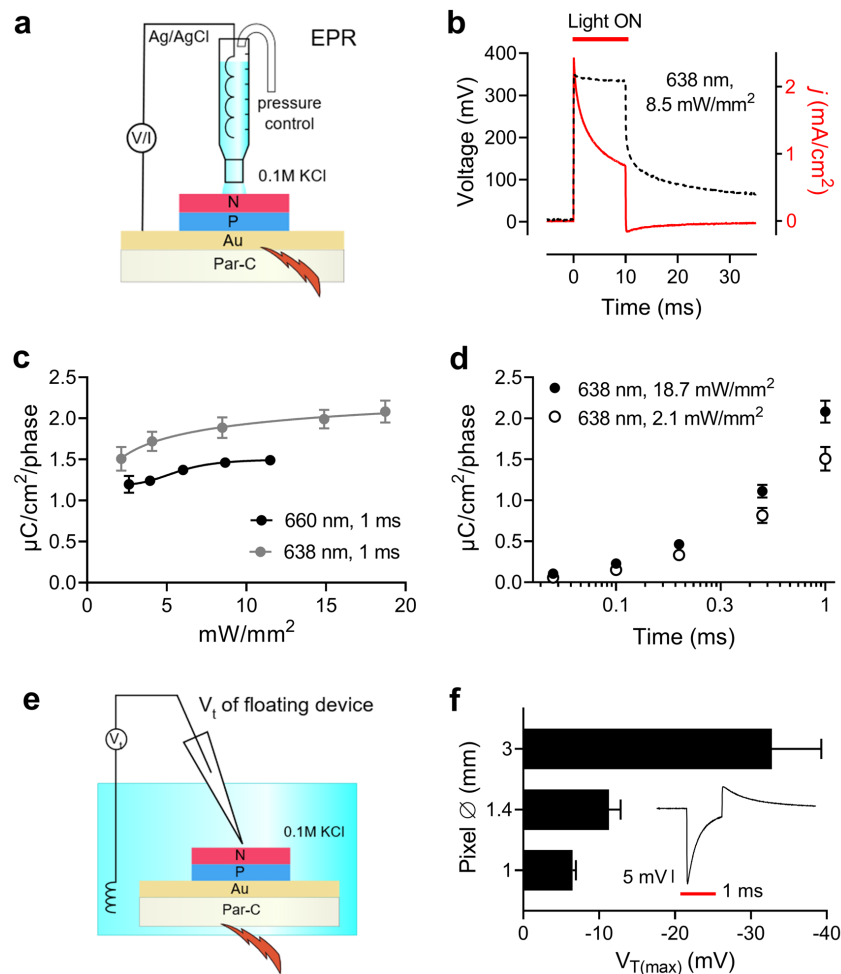

1  
 2 **Figure 2. | Photostimulated OEPC devices deliver rapid localized electrolytic pulses**  
 3 **a**, Schematic of the electrophotoreponse (EPR) closed-circuit measurement, where  
 4 photovoltage or photocurrent is measured between the bottom metal contact and an  
 5 electrolytic contact. This method probes photogenerated charge injection across the  
 6 PN/electrolyte junction. **b**, Photovoltage and photocurrent registered by EPR, using  
 7 excitation with a 638 nm laser diode. Devices charge to full voltage within 20  $\mu$ s. **c**, Charge  
 8 density per phase as a function of light pulse intensity, for 1 ms light pulses of either 638  
 9 or 660 nm light,  $n=2$ ,  $\pm$ SD. **d**, Charge density per phase as a function of light pulse duration,  
 10  $n=2$ ,  $\pm$ SD. **e**, Transient voltage,  $V_T$ , probes the voltage perturbation generated in electrolyte  
 11 when displacement currents flow from anode (Au) to cathode (PN).  $V_T$  is registered  
 12 between a point above the center of the PN pixel versus a distant Ag/AgCl reference. This  
 13 method reflects the actual electrical perturbation nerve fibers would experience from the  
 14 OEPC stimulator. **f**,  $V_T$  during a 1 ms light pulse, showing the clear biphasic current  
 15 behavior. All pixels give qualitatively the same trace, only the magnitude of voltage varies  
 16 with pixel diameter. The bar graph plots the cathodic maximum  $V_T$  as a function of PN  
 17 pixel diameter.  $n = 3$  for each size,  $\pm$ SD.

18  
 19 ***Acute validation of light-induced nerve stimulation***



1 To test the efficacy of *in vivo* neuromodulation using OEPC devices, we used the well-  
2 established rat sciatic nerve model<sup>12,16</sup>. To determine the effectiveness of OEPC-mediated  
3 nerve stimulation, microwires capable of measuring evoked compound muscle action  
4 potentials (CMAPs) were placed in biceps femoris (Figure 3a) and plantar muscle groups  
5 (Supplementary Figure S1) of 5 rats. OEPC devices integrated into parylene C ribbons  
6 were wrapped around the nerve with the PN pixel immediately adjacent to the epineurium.  
7 The ribbon was not fixed in any way other than simple adhesion of the loose plastic ends  
8 to each other via capillary interactions in the presence of water. Intra-operatively, OEPC  
9 ribbons with differently sized PN pixels (1 mm  $\varnothing$ , 1.4 mm  $\varnothing$ , and finally 3 mm  $\varnothing$ , denoted  
10 henceforth as three device sizes S, M, and L) were illuminated using an LED (660 nm)  
11 with a collimator lens that was placed above the exposed nerve (Figure 3b). OEPCs were  
12 consistently placed such that the PN pixel pointed in the dorsocaudal direction relative to  
13 the rat's body. To ensure that any recorded CMAPs were the result of light-mediated  
14 photovoltaic stimulation, we first placed a sham device (bare parylene C covered with Au  
15 in the absence of a PN pixel) on the nerve. Illumination of this sham device did not yield  
16 any response or artefact (Figure 3c, Supplementary Figure S1b). In contrast, illumination  
17 of OEPC devices stimulated the sciatic nerve, as demonstrated by visually observable  
18 twitching in sciatic-innervated muscles and recorded CMAPs (Figure 3d: CMAPs in  
19 response to 1-ms, 9.4 mW/mm<sup>2</sup>, illumination pulses; see also Supplementary Figure S1c,  
20 and Supplementary Video 1). Increased size of the PN pixel strongly correlated with higher  
21 stimulation as measured by larger amplitude of both observable movement and the average  
22 CMAP waveform (Figure 3d, Supplementary Figure S1c), concurring with the predictions  
23 of  $V_T$  measurements (Figure 2f). The elicited CMAPs were also highly consistent in both  
24 amplitude and latency after repetitive light-stimulation (Figure 3e, Figure S1d; 25 light-  
25 pulses, 3 seconds between). Taken together, these results demonstrate the ability of the  
26 OEPC to transduce light impulses to electrical potentials that are capable of consistently  
27 and repetitively stimulating the sciatic nerve, with response magnitude dependent on PN  
28 pixel size.

29 *In vivo* neurostimulation often requires precise control of response timing and amplitude.  
30 Using M- and L-sized OEPC devices, we therefore determined the relationship between  
31 light intensity and light pulse duration with CMAP responses (Figure 3f-h, Figure S1e-g).  
32 For size M devices, light intensities in the range of 4-10 mW/mm<sup>2</sup> evoked robust CMAP  
33 responses, and visible movements in the leg and paw (Figure 3f,g, Figure S1e,f). Light-  
34 pulse durations between 200-500  $\mu$ s were needed to reach a threshold of visible movement.  
35 With the L-sized OEPC device, the light intensity and light-pulse duration could be  
36 significantly reduced (Figure 4f,h, Supplementary Figure S1e,g). For instance, at 1  
37 mW/mm<sup>2</sup>, using 1-ms light-pulses, the CMAP response already saturated for both muscles  
38 (Figure 3h, Figure S1g). Consequently, shorter light-pulse lengths (100  $\mu$ s) could be used  
39 to reach a threshold of visible movement. Therefore, light intensity, light-pulse duration,  
40 and PN pixel size interplay to produce a given level of OEPC-mediated neurostimulation.

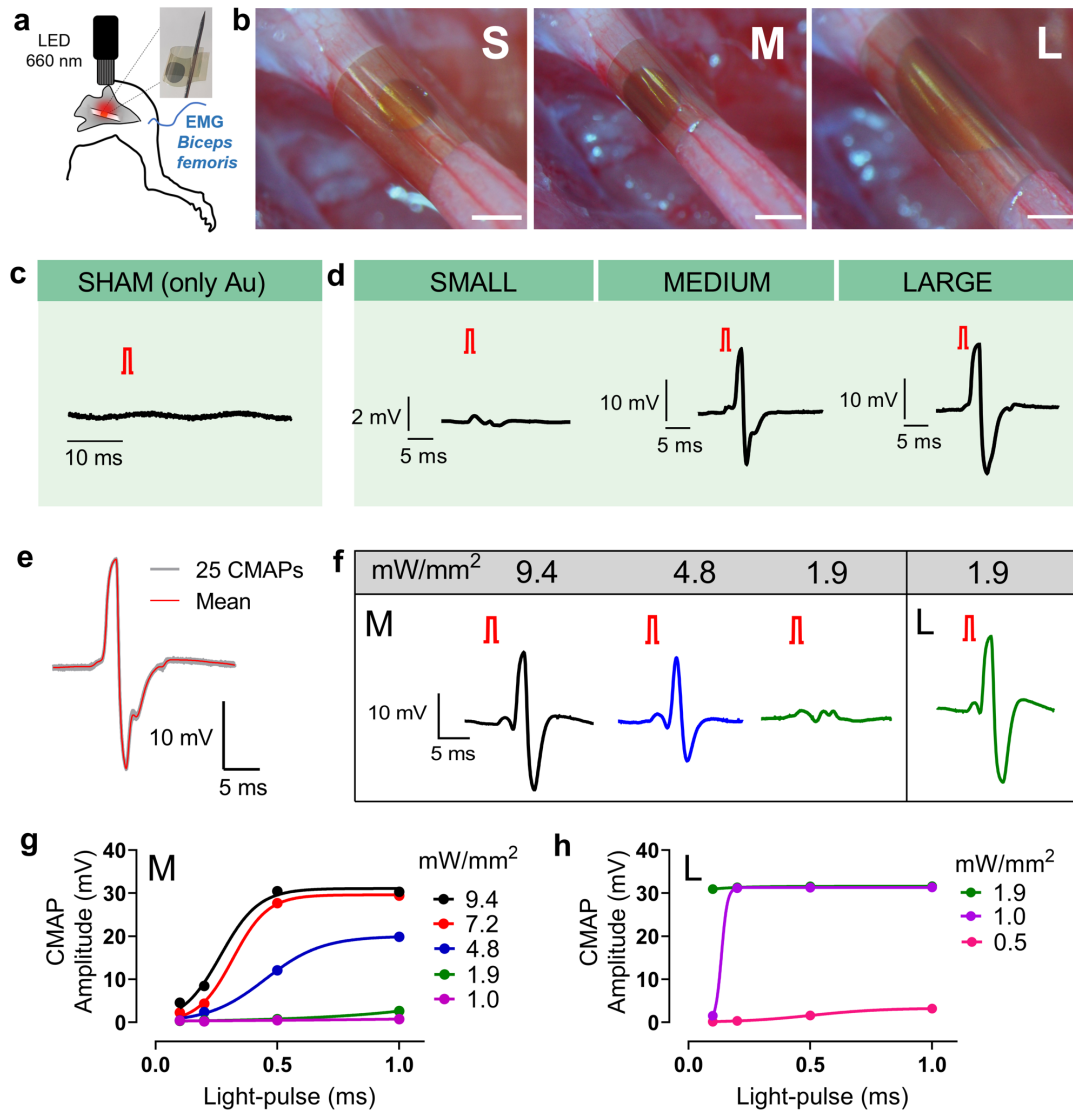

1  
2 **Figure 3. | Acute sciatic nerve photostimulation is precisely controlled by varying**  
3 **OEPC device size, light intensity, and stimulation pulse length.** **a**, Schematic of the  
4 sciatic nerve stimulation experiment design for acute conditions, with inset photograph  
5 showing a free-standing device prior to implantation. **b**, Photographs of S, M, and L devices  
6 wrapped around the sciatic nerve. Scale bar 1 mm. **c**, Illumination of a sham device, without  
7 the PN pixel (only gold on parylene C) gives no response or artefact. 1-ms light-pulses, 9.4  
8 mW/mm<sup>2</sup> irradiation. **d**, Averaged evoked CMAPs in the biceps femoris (Rat #1) during  
9 25 repetitive light-pulse stimulation (1 ms pulses, 9.4 mW/mm<sup>2</sup> irradiation, 3 seconds in-  
10 between), for the respectively-sized OEPC devices. **e**, Highly reproducible repeated  
11 stimulation can be evidenced when 25 CMAPs are plotted on top of each other (in grey)  
12 for biceps femoris after repetitive stimulation with a M-sized OEPC device (Rat #1, 1 ms  
13 light pulses, 9.4 mW/mm<sup>2</sup> irradiation, 3 seconds in-between). The averaged response is  
14 shown in red. **f**, Examples of CMAPs evoked at different light intensities, 1 ms pulses on  
15 M- and L-sized OEPC devices (Rat #2) **g**, Average biceps femoris CMAP amplitudes

1 versus light-pulse length, at different light intensities. M-sized OEPC device. 25 pulses, 3  
2 seconds in-between, for each condition. **h**, Average biceps femoris CMAP amplitudes  
3 versus light-pulse length, at different light intensities. L-sized OEPC device. 25 pulses, 3  
4 seconds in-between, for each condition. CMAP amplitude saturates at lower intensities and  
5 pulse times for the L device compared with the M device.

### 6 7 ***Chronically implantable photocapacitor (CIP) development and implementation***

8 Following acute nerve stimulation experiments, we aimed to engineer the OEPC for  
9 chronic implantation by developing a more chemically and mechanically stable interface  
10 with the nerve. The OEPC relies on an ultrathin Au semitransparent conductive layer on  
11 parylene C as the return (+) electrode. However, we found that this Au layer loses  
12 conductivity and delaminates when stored in chloride-containing electrolytes for more than  
13 two weeks. This likely precludes *in vivo* longer-term use. To stabilize the thin Au, we  
14 deposited a 30 nm-thick encapsulating layer of indium tin oxide (ITO), which has excellent  
15 adhesion with Au<sup>54</sup>. ITO has a wide electrochemical passivity window<sup>55</sup>, is  
16 biocompatible<sup>56,57</sup>, and does not compromise transparency or conductivity. Furthermore,  
17 the ITO layer enabled convenient new micropatterning approaches for us, based on the  
18 parylene peel-off lithography<sup>58</sup>, at it served as an effective etch-stop for O<sub>2</sub>-reactive ion  
19 etching (see *Methods*). To predict *in vivo* stability and functionality of CIP devices, we  
20 conducted accelerated aging/stressing tests by immersing devices in 0.1 M KCl solution  
21 set to 42 °C, and illuminating them with constant light pulses (2 Hz) delivered through a  
22 high-density LED array. Devices were periodically removed and photovoltage and  
23 photocurrent were registered using the previously-described EPR technique. No devices  
24 failed, and photovoltage/current retained greater than 85% of starting values over the  
25 course of 89 days of continuous stressing (corresponding to 14 million charge/discharge  
26 cycles; Figure 4a). Thus, the ITO modification of the OEPC gives promising indications  
27 of robustness. Because the L-sized OEPCs performed optimally at low-light intensities in  
28 acute experiments, this PN pixel size was used for fabrication of CIP devices.

29  
30 To ensure conformable contact with neural tissue and prevent damage caused by tension  
31 or pressure, we had chosen from the start to use ultra-thin parylene C substrates for the  
32 OEPC neural interfaces. Parylene C can maintain mechanical contact via capillary forces  
33 in the presence of water, but this contact was insufficient to immobilize the device on the  
34 nerve for long-term stable stimulation. Therefore, we adapted a parylene zip-tie locking  
35 mechanism<sup>59,60</sup> that allowed the device to form a cuff around the nerve in a fixated position.  
36 One end of the parylene C substrate ribbon was narrowed and modified to contain a small  
37 guiding loop, and the other end widened to contain a narrow locking loop (Figure 4b-d).  
38 When the guiding loop ribbon was passed through the locking loop, locking “teeth” along  
39 the lateral borders of the ribbon allowed for sizing of the cuff diameter and prevented  
40 slippage of the ribbon ends (Figure 4c). This CIP remained fully conformable, and was  
41 sized to accommodate the dimensions of rat sciatic nerve accessible through minimally  
42 invasive surgical incision. Evaporated aluminum, which is a relatively malleable metal,  
43 (1.5 μm thickness) encapsulated with parylene C, reinforced the loops and teeth (Figure  
44 4e). These aluminum-stiffened “teeth” and loops provide mechanical robustness of the  
45 locking mechanism and enable facile manipulation with surgical tools during the  
46 implantation procedure.

1  
2 Implantation was performed by sliding the ribbon of the CIP behind the sciatic nerve  
3 (Figure 4f) and pulling the guiding loop through the locking loop with fine forceps (Figure  
4 4g). Once advanced through the locking teeth, the excess parylene C ribbon was trimmed  
5 and the sciatic nerve resumed anatomic position relative to the muscles of the hindlimb  
6 (Figure 4h). This procedure was straightforward and required 5 minutes of surgical time,  
7 fulfilling a key criterion for translation of such devices to practical applications<sup>61</sup>. The  
8 incision was then sutured, separating the CIP from the surface of the skin by approximately  
9 10-15 mm of skin, subcutaneous tissue, and muscle (Figure 4i). CMAPs evoked by CIP  
10 devices had comparable light intensity-dependent amplitude responses to acutely  
11 implanted OEPCs, confirming that design modifications to enable chronic implantation did  
12 not adversely affect functionality (Figure 4j).  
13

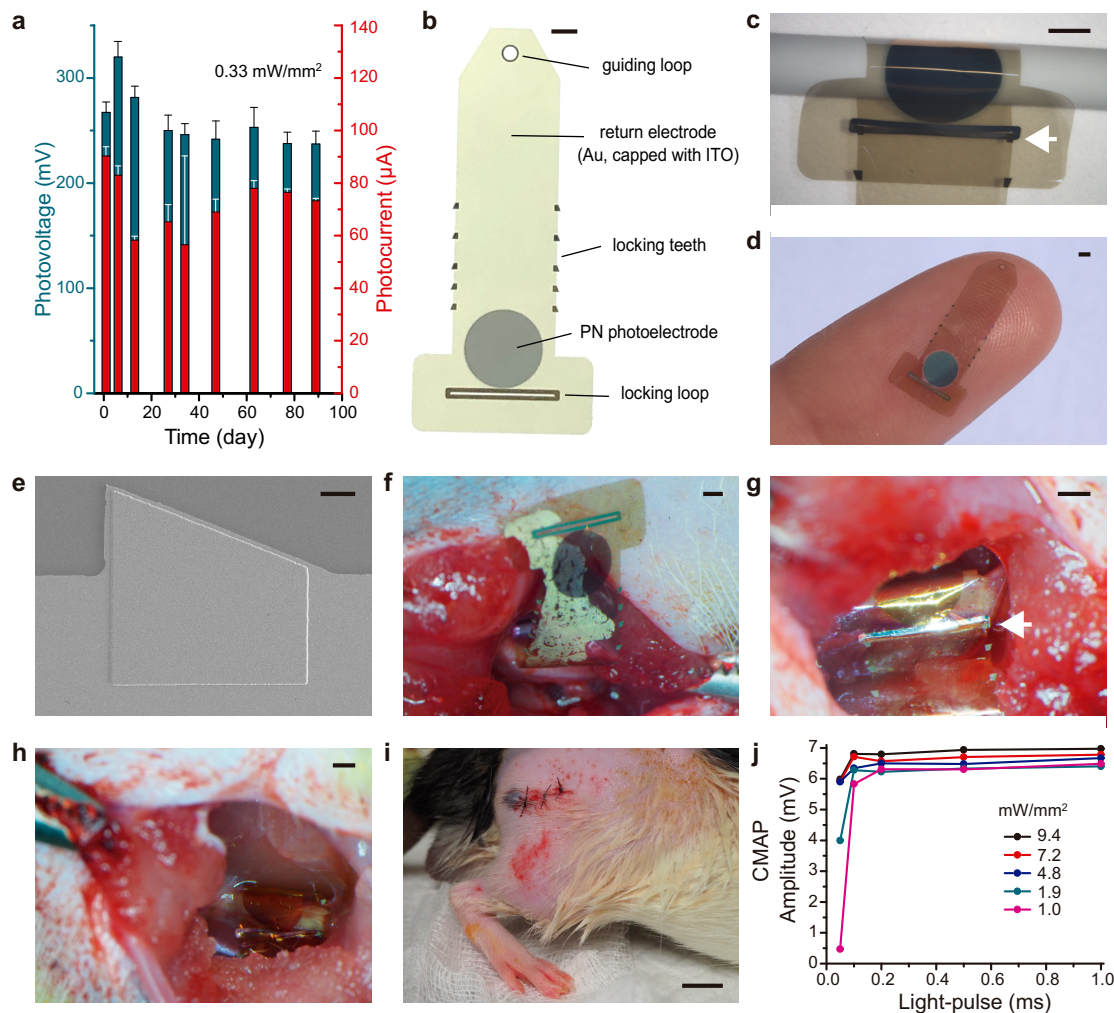

14  
15 **Figure 4. | Self-fixating OEPCs are mechanically robust to intra-operative placement**  
16 **and chronic *in vivo* implantation.** **a**, Verification of *in vitro* stability: Photovoltage and  
17 photocurrent recorded periodically for devices subjected to accelerated aging conditions in  
18 0.1 M KCl solution at 42 °C with light pulsing stress totaling 14 million charge/discharge

1 cycles.  $n = 4$ , avg.  $\pm$  SD. **b**, Photograph of the zip-tie CIP device with labeled components,  
2 and **c**, when wrapped and locked around a nerve phantom (1.4 mm diameter cylinder). The  
3 white arrow indicates the locking tooth. Scale bars 1 mm. **d**, Photograph of the  
4 conformable, ultralight and biocompatible CIP final design; scale bar 1 mm. **e**, SEM  
5 micrograph of the parylene-encapsulated aluminum tooth; scale bar 40  $\mu$ m. **f**, CIP  
6 implantation was initiated by inserting the end of the ribbon behind the nerve and tucking  
7 it below the nerve; scale bar 1 mm **g**, The PN pixel was positioned adjacent to the external  
8 facing surface of the nerve and the end of the ribbon was pulled through the loop to lock  
9 the ratchet teeth against the loop edges (white arrow); scale bar 1 mm. **h**, CIP device closed  
10 around sciatic nerve, scale bar 1 mm. **i**, Sutured incision after CIP implantation was  
11 complete, scale bar 1 cm. **j**, Relationship between light intensity/pulse time and CMAP  
12 amplitude for implanted CIP device prior to incision closure.

13  
14 We implanted CIP devices into a cohort of six rats and monitored functionality at regular  
15 intervals over the course of three months. To minimize animal discomfort, we recorded  
16 CMAPs through gel-based cutaneous electrodes (Figure 5a). Light stimulation from  
17 outside the body (using a 638 nm diode laser with a 2 mm  $\varnothing$  illumination spot, 700 mW  
18 max as shown in Figure 1d-f) elicited robust and repeatable CMAPs in all rats, some of  
19 which were associated with large-amplitude muscular twitches (Figure 5b, Supplementary  
20 Video 2).

21  
22 CIP devices generated detectable CMAPs in all rats for 20 days, and the majority were  
23 functional for longer than 60 days (Figure 5c). In two rats, devices remained functional at  
24 timepoints greater than 100 days post-operatively, and CMAPs were obtainable in both the  
25 anesthetized and awake states (Figure 5d,e). Furthermore, when CIPs were functional,  
26 latency of CMAP onset from application of light stimulus was relatively constant for light  
27 stimuli of variable intensity and duration (Figure 5f), indicating stable nerve conduction  
28 velocity at values expected for the intact rat sciatic nerve<sup>62</sup>. We observed that CMAP  
29 amplitude was typically stable for a prolonged time period without decay, but could  
30 experience abrupt decrement (Figure 5d, left to middle) that was associated with slightly  
31 increased CMAP latency (Supplementary Figure S2). However, CIP devices remained  
32 capable of eliciting CMAPs with similar amplitude and latency to those obtained shortly  
33 after implantation when light intensity was increased by eliminating tissue attenuation  
34 (Figure 5d, right, Supplementary Video 3, Supplementary Figure S2). Given these results,  
35 we hypothesize that the alteration in CMAP properties during the implantation period was  
36 related to generation of a submaximal neural excitatory pulse due to decreased CIP  
37 stimulation performance (*i.e.* device degradation) rather than compromise of the nerve<sup>63</sup>.  
38 Post-mortem explantation of CIP devices revealed partial delamination of organic PN  
39 material from the parylene C substrate (Supplementary Figure S3). This observation of  
40 device degradation is in contrast to the results of the accelerated ageing tests *in vitro* shown  
41 in Figure 4a. These findings highlight the importance of performing chronic *in vivo*  
42 experimentation in order to subject devices to the full range of biochemical and mechanical  
43 stressors present in a freely moving organism.

44  
45 None of the rats demonstrated motor deficit at any time post-implantation. Each rat was  
46 capable of running, standing on hindlimbs, and climbing (Figure 5g-h, Supplementary

1 Video 4), suggesting that CIP implantation does not impair motor function. Consistent with  
 2 this notion, there were no gross pathological differences between the implanted and  
 3 contralateral sciatic nerve on post-mortem examination (Figure 5i).

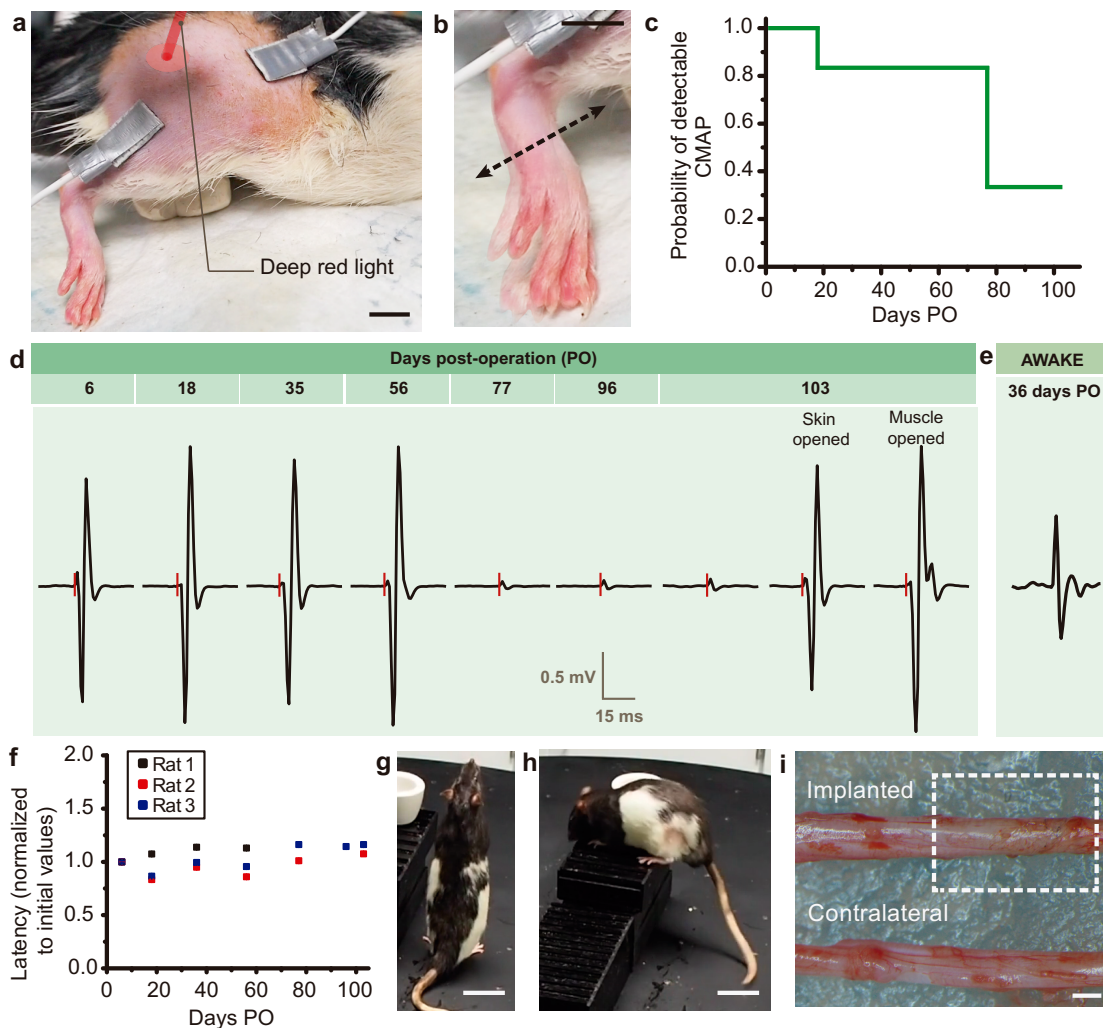

4  
 5 **Figure 5. | OEPCs permit chronic, non-invasive *in vivo* sciatic nerve stimulation.**  
 6 Healed implanted area after post-surgical recovery with surface electrodes for EMG  
 7 measurement attached; scale bar 1 cm. **b**, Photoinduced stimulation with 200-1000  $\mu$ s at  
 8 700 mW induced observable muscular twitches; scale bar 1 cm; see Supplementary Video  
 9 2. **c**, Survival curve demonstrating the persistence of detectable CMAPs over the  
 10 implantation period for all rats ( $n = 6$ ). **d**, Representative averaged CMAPs over 103 days  
 11 of chronic implantation. CMAP amplitude abruptly decreased by 77 days post-operatively  
 12 (PO), but the device was revealed to be functional upon increased light delivery  
 13 accomplished by opening the overlying tissue. The red dashes indicate light stimulation  
 14 pulses. **e**, Representative photoinduced CMAPs recorded in an awake rat. **f**, Stable average  
 15 latency between light pulse and CMAP peak over initial implantation period for the three  
 16 rats with functional devices exceeding 60 days. **g-h**, All rats ( $n = 6$ ) exhibited normal  
 17 behavior without noticeable hindlimb-related movement impairments, including standing  
 18 on hindlimbs, climbing or running (see Supplementary Video 4); scale bar 5 cm. **i**,

1 Implanted sciatic nerve area did not show gross pathological changes compared to the  
2 unimplanted contralateral sciatic nerve; scale bar 1 mm.

### 4 **Discussion**

6 We have demonstrated that ultrathin organic photocapacitors can be microfabricated into  
7 conformable devices that are capable of generating sufficient electrical charge to modulate  
8 neural tissue *in vivo*. Device-mediated neuromodulation is accomplished via noninvasive,  
9 tissue-penetrating deep red-light. Chronically implanted photocapacitors exhibit  
10 physiologic stability and functional stimulation of a peripheral nerve over months in a  
11 freely-moving animal and do not incur motor deficit. In contrast to many other wireless  
12 neuromodulation devices, such as electromagnetic induction or ultrasound-based  
13 transducers, photocapacitors are microfabricated in a thin film configuration, resulting in a  
14 minimally invasive interface with tissue.

15 Photocapacitors offer several advantages compared to other stimulation modalities.  
16 Conventional electrical stimulation is accomplished by wired leads connected to an  
17 implanted power source, a configuration that is a common cause of device complications<sup>64</sup>.  
18 We show that photocapacitors are capable of chronic electrical stimulation by directly  
19 converting light impulses into charge-balanced biphasic electrical signals, which is  
20 considered favorable for safe long-term stimulation<sup>51</sup>. Furthermore, the charge generated,  
21 and thus the neural response elicited, are directly related to the strength and duration of the  
22 light pulse. These features enable precise temporal and amplitude control of stimulation  
23 patterns. Because photocapacitors are microfabricated, they are inherently customizable.  
24 The size, configuration, and location of PN junctions can be modified within a variable  
25 shape and size of ribbon substrate, permitting application to nerves of different diameters,  
26 as well as other types of neural tissue. Our flexible locking mechanism minimizes risk of  
27 tissue damage while maintaining steady device position *in vivo*. In addition, no power  
28 source apart from the light pulse is necessary to operate the device, eliminating risks  
29 associated with implanted power hardware<sup>65</sup>. Photovoltaics based on the same active  
30 components as used in CIPs could also conceivably be used to non-invasively power other  
31 electrical components and enable information transmission via narrow-band LEDs and  
32 photodiodes.

34 To facilitate translation of photocapacitor devices to clinical applications, sustained  
35 performance should be demonstrated over prolonged time periods. Current CIP devices  
36 functioned for months in a freely moving rodent, establishing potential feasibility. There  
37 are three clear areas for optimization of CIPs: device stability, efficiency, and higher light  
38 sensitivity at longer wavelengths. Device longevity could be improved by encapsulation of  
39 the PN pigment with a conductive layer that prevents exposure of the internal device layers  
40 to electrolyte without decreasing electrical performance. The second parameter to optimize  
41 is light-to-charge efficiency of the devices, which would allow for operation in deeper  
42 tissues and increase the variety of targetable neural structures. Alternatively, it is possible  
43 to microfabricate conformable circuits that transmit electrical charge to deeper structures  
44 while maintaining the photoactive pigments closer to the external tissue interface for  
45 effective light activation. However, much can be gained by tuning the stimulation  
46 wavelength. According to our MC model, a wavelength of 700 nm would be optimal in

1 terms of transmission, and would nearly double the possible implantation depth  
2 (Supplementary Figure S4). On the other hand, tuning photocapacitor devices to respond  
3 even further to the red, 800-900 nm, could also be advantageous for comfort of human  
4 subjects, as at these wavelengths tissue transparency is sufficient for device operation, but  
5 human vision is no longer sensitive<sup>36</sup>.

6  
7 Electrical neurostimulation is employed not only to assay neural function in experimental  
8 paradigms<sup>66</sup>, but is an efficacious and well-tolerated therapy for multiple neurologic  
9 disorders, from chronic pain to epilepsy<sup>67</sup>. CIPs can facilitate testing of such  
10 neuromodulatory protocols in small animal models by minimizing device footprint and  
11 allowing for full device implantation without any tissue traversing elements, features that  
12 have been demonstrated to improve experimental outcomes<sup>68,69</sup>. The unique features of  
13 CIPs also advance the potential for translation to bioelectronic devices that require safe,  
14 long-term neurostimulation to treat pain and enable motor rehabilitation in humans.

## 15 16 **Methods**

17  
18 ***OEPC device fabrication.*** H<sub>2</sub>Pc, (Phthalocyanine, Alfa Aesar) and PTCDI (*N,N'*-dimethyl-  
19 3,4,9,10-perylenetetracarboxylic diimide, BASF) were first purified by threefold  
20 temperature-gradient sublimation. 4-inch soda lime glass wafers (University Wafer,  
21 550 μm thick) were cleaned in a circulating 2% solution of Hellmanex III detergent heated  
22 to 50°C for 30 min followed by a high-pressure rinse with acetone and deionized water  
23 (DI). The wafers were then treated with O<sub>2</sub> plasma (Diener electronic GmbH, 200 W, 20  
24 min). Immediately after, a 5 μm-thick parylene C layer was deposited via chemical vapor  
25 deposition (Diener electronic GmbH). The parylene C was then patterned by lithography  
26 and etching to produce 4 × 15 mm ribbons. This was done as follows: An aluminum reactive  
27 ion etching (RIE) hard mask was deposited through a stainless steel shadow mask onto the  
28 parylene C wafer. The 80 nm layer of Al was evaporated in a PVD chamber in a vacuum  
29 of < 2 × 10<sup>-6</sup> Torr using a rate of 5-15 Å/s. Parylene C was removed by RIE (200W, O<sub>2</sub> 100  
30 sccm). Finally, the Al mask was etched using a commercial wet etch solution. The parylene  
31 surface was then activated with O<sub>2</sub> plasma (50 W, 2 min), followed by vapor-phase  
32 treatment with 3-(mercaptopropyl)trimethoxysilane, MPTMS, by placing the samples in  
33 an MPTMS-vapor saturated chamber heated to 90 °C for 1 h. MPTMS treatment enhanced  
34 the adhesion of Au to the parylene C substrate. Next, a 10 nm-thick film of Au was  
35 thermally evaporated over the whole wafer in a vacuum of < 2 × 10<sup>-6</sup> Torr using a rate of 3-  
36 5 Å/s. The organic pigment PN pixels were formed by thermal evaporation through a  
37 shadow mask at a base pressure of < 2 × 10<sup>-6</sup> Torr using a rate of 0.1-0.5 nm/s. 30 nm of  
38 P-type H<sub>2</sub>Pc and 30 nm of N-type PTCDI were successively deposited resulting in 60 nm  
39 total thickness of the organic layers (PN). It should be noted that efforts were made to  
40 produce semitransparent contacts from other materials, such as ITO. However, due to poor  
41 adhesion to the parylene substrate, approaches with ITO alone proved unsuccessful.

42  
43 ***Optical tissue penetration modeling.*** Monte-Carlo light propagation simulation was  
44 conducted using the CUDAMCML software<sup>47</sup>, a gpu-accelerated version of the well-  
45 established MCML software<sup>46</sup>. The tissue model consisted of three layers, a 1 mm layer of  
46 skin followed by 3 mm of subcutaneous adipose tissue and a 50 mm thick layer of muscle.



1 Rat tissue optical parameters for all the wavelengths from Bashatkov and coworkers<sup>48</sup> were  
2 used. Light penetration was evaluated on a 0.1 mm vertical and radial mesh. 5 billion  
3 photons were used for each run of the simulation. The output files were convolved by the  
4 CONV software (a part of the MCML distribution), assuming a 2 mm FWHM diameter  
5 Gaussian light beam normalized to 700 mW of total power.

6  
7 **Photoelectrochemical characterization.** Measurements of photovoltage and charging  
8 current of OEPC devices was performed according to previously described methods<sup>43</sup>.  
9 Briefly, the backside Au of the OEPC was contacted with a probe electrode connected to  
10 the positive terminal of an oscilloscope. Meanwhile, the negative terminal was connected  
11 to an Ag/AgCl electrode in 0.1 M KCl electrolyte, making contact to the top of the organic  
12 layer of the OEPC device. The droplet contact area was 0.126 cm<sup>2</sup>. Pulsed illumination was  
13 provided by a 638 nm laser diode or a 660 nm high-power LED at various light intensities.  
14 Light intensity was verified using a calibrated Thorlabs Si PIN diode (Thorlabs  
15 SM1PD1B). The transient voltage change ( $V_t$ ) was measured when the OEPC device was  
16 immersed in 0.1 M KCl, using a GeneClamp 500B amplifier (Axon Instruments) and a  
17 Digidata™ 1440A converter (Molecular Devices), as described previously<sup>43</sup>.

18  
19 **Acute sciatic nerve stimulation.** All animal experiments were approved by the institutional  
20 *Animal Care and Use Committee* of Columbia University Irving Medical Center. The  
21 implantations were carried out in Long Evans rats (200-250g at the time of implantation)  
22 that had no previous experimentation. Animals were housed in pairs, in a regular 12h/12h  
23 light/dark cycle and had access to food and water *ad libitum*.

24 Rats were anesthetized using 3% isoflurane and surgical site was shaved, disinfected and  
25 local analgesia was applied. A longitudinal incision (~1cm) along femoral axis was  
26 performed and the sciatic nerve was visualized. The connective tissue surrounding the  
27 nerve was minimally dissected to release and expose a longitudinal nerve section  
28 approximately 4mm long. OEPC devices were wrapped around the nerve, facing the PN  
29 pixel to the nerve surface, and fixed through adhesion of the parylene ribbon ends via  
30 capillary forces. 3 PN pixel diameter sizes (1, 1.4 and 3 mm) were tested. Tungsten  
31 microwires (diameter 50  $\mu$ m) were placed in biceps femoris and plantar muscles, each  
32 providing a separate recording channel referenced to a microwire in the paraspinal  
33 subcutaneous tissue. CMAPs were recorded using a custom designed board based on an  
34 AD8237 differential amplifier chip and an RHD2000 board (Intan Technologies) for  
35 digitization. Illumination was provided by a 660 nm high-power LED (M660L4) with a  
36 collimator lens (SM2F32-B) controlled by a ThorLabs DC2200 High-Power LED. A  
37 minimum of 25 light pulses (3 s in between) was used for each light intensity/duration  
38 condition tested. Light intensity was verified with a Thorlabs SM1PD1B Si PIN diode. At  
39 the conclusion of the intra-operative recording session, the rats were euthanized. 5 rats were  
40 used for acute sciatic nerve experiments that aimed to characterize the performance of  
41 OEPC devices in regards of PN pixel size, light intensity, and light pulse duration.

42  
43 **Chronically implantable device fabrication.** Clean 4" wafers were coated with 2.2  $\mu$ m  
44 parylene C. The surface was then activated by an oxygen plasma treatment (50W, 120s)  
45 followed by physical vapor deposition of 1.5-2  $\mu$ m thick layer of aluminum (vacuum  $<1 \times$   
46  $10^{-5}$  Torr, 20-30 nm/s) acting as mechanical support for the locking mechanism structures.

1 S1818 photoresist was spin coated on the substrates, exposed with MA6/BA6 Süss Mask  
2 Aligner and developed in MF-319. The aluminum layer was patterned using a commercial  
3 acidic etchant. The resist was stripped in acetone, followed by isopropanol and deionized  
4 water (DI). Propylene carbonate was then spin coated on the wafers at 2000 rpm and baked  
5 at 60°C for 30s to act as an adhesion promoter<sup>70</sup> for the next 2.2 µm thick encapsulating  
6 layer of parylene C. The surface was then exposed to oxygen plasma (50W, 120s) and  
7 vapor treated with MPTMS in a closed chamber at 80°C for 2h. The wafers were then  
8 washed with acetone, isopropanol and DI. Next, 10 nm of gold and a 30 nm of indium tin  
9 oxide (ITO) were sputtered onto the substrates. The sputtering target was In<sub>2</sub>O<sub>3</sub>/SnO<sub>2</sub> 90/10  
10 wt%, 99.99% pure (Lesker). Gold was deposited at 100 W, 3.4 mbar, 100% Ar, DC; ITO  
11 at 32 W, 4.5 mbar, 97% Ar, 3% O<sub>2</sub>, RF. The outline of the implants was patterned using  
12 S1818 photoresist, MF-319 developer, ITO etchant (concentrated HCl), Au etchant (KI/I<sub>2</sub>)  
13 and finally by RIE (200W, O<sub>2</sub> 100 sccm). The wafer was washed in acetone, isopropanol  
14 and DI. A thin layer of 2% cleaning agent Micro90 was spin coated at 1000 rpm to act as  
15 an anti-adhesive layer before the next 2.2 µm thick sacrificial layer of parylene C. The  
16 openings for the photopixels were patterned by AZ 10XT resist, AZ developer and RIE  
17 (200W, O<sub>2</sub> 100 sccm). The wafers were sequentially washed with acetone, isopropanol and  
18 DI. Then the protective layer of ITO was etched with concentrated HCl for a few seconds,  
19 followed by a quick wash in DI. Next, the organic pigments H<sub>2</sub>Pc and PTCDI were  
20 evaporated from resistively heated crucibles at  $1 \times 10^{-6}$  Torr at rates of 1-6 Å/s to produce  
21 a 30/30 nm PN junction. Finally, the sacrificial parylene layer was peeled off to yield the  
22 patterned device. The wafer was rinsed with DI and tested using the EPR setup described  
23 above. In addition, control devices were subjected to an accelerated aging and light-  
24 stressing test according to the method described previously<sup>44</sup>.

25  
26 ***Chronic implantation test on the sciatic nerve.*** Rats were anesthetized and the sciatic  
27 nerve was exposed as previously described for acute stimulation. The CIP ribbon was  
28 passed behind the exposed sciatic nerve and the end of the ribbon was inserted through the  
29 ribbon loop using forceps. The PN pixel was placed facing the nerve surface, and the ribbon  
30 was pulled until the teeth passed through the ribbon loop, firmly closing the zip-tie  
31 mechanism. The ribbon was adjusted to fit snugly around the nerve without applying  
32 compressive force. The excess ribbon (~5mm) was then cut. Sutures were used to close the  
33 incision. After the operative procedure was complete, anesthesia was removed and the rats  
34 were allowed to recover from surgery. Triple antibiotic ointment and injectable analgesia  
35 were applied during the post-surgical recovery period.

36 The CMAP recording sessions were performed at 6, 18, 35, 56, 77, 96 and 103 days post-  
37 operatively (PO). Rats were anesthetized (3% isoflurane) and the implanted site was shaved  
38 to facilitate the attachment of EMG electrodes to the skin. Because multiple recording  
39 sessions were planned for each rat, we performed non-invasive CMAP monitoring to  
40 prevent ongoing disruption of muscle tissue. Gel electrodes (14 × 9 mm, Acuzone) were  
41 attached to the skin using Elefix conductive paste (Nihon Kohden). Electrodes were placed  
42 in gastrocnemius and vastus lateralis (reference electrode) muscles, maintaining a  
43 consistent inter-electrode distance across sessions. Photostimulation was induced by a 638  
44 nm laser diode with a maximum output power of 700 – 1200 mW driven by ThorLabs  
45 DC2200 High-Power LED controller. 250 light pulses (3s interpulse interval) with an  
46 intensity spanning 700 mW to 7 mW and duration from 1 ms to 0.05 ms were used. CMAP

1 signals were recorded as during the acute stimulation sessions. Video recordings of  
2 muscular twitches were performed.

3 Motor performance of the rats was evaluated in the immediate post-operative period and  
4 tested on an open field maze with horizontal and vertical obstacles at 53-54 days post-  
5 operatively. Walking and running gait, as well as ability to stand on hindlimbs and climb  
6 were observed.

7 In the subset of rats that showed responses after 103 days PO, the CMAPs were additionally  
8 recorded after creating an incision over the implantation site and opening the skin.

9 Subsequently, photoinduced stimulation was repeated as per the above parameters after  
10 exposing the device to quantify device performance under maximal light intensity  
11 conditions.

12 At the end of the implantation period, the rats were euthanized, and the implanted sciatic  
13 nerve section was harvested and dissected. Additionally, the contralateral sciatic nerve  
14 anatomically corresponding to the implanted region was harvested for comparison. Gross  
15 pathological examination was performed for all harvested nerve segments. A total of 6 rats  
16 were used for chronic sciatic nerve experiments.

### 17 18 **Author Contributions**

19 M.S.E.; M.J.; J.F.L.; and L.M. contributed equally to this manuscript. M.S.E.; M.J.; and  
20 L.M. carried out the photoelectrochemical characterizations. M.S.E.; M.J., V.Đ.; D.K.; J.G.  
21 performed acute experiments and analyzed data. L.M. fabricated devices for acute  
22 experiments. M.J. fabricated devices for chronic experiments. V.Đ. wrote programs for  
23 data acquisition, processing, and all modeling. Z.Z. designed and developed the  
24 electrophysiological acquisition hardware. J.F.L.; D.K.; and J.G. performed the rodent  
25 surgeries. Chronic data was collected and analyzed by M.J.; J.F.L.; Z.Z.; J.G.; and E.D.G.  
26 The project was led and supervised by M.B.; D.K., V.Đ.; J.G.; E.D.G. The manuscript was  
27 written with input from all coauthors.

### 28 29 **Acknowledgements**

30 The authors gratefully acknowledge financial support from the Knut and Alice Wallenberg  
31 Foundation within the framework of the Wallenberg Centre for Molecular Medicine at  
32 Linköping University, the Swedish Research Council (Vetenskapsrådet, 2018-04505), and  
33 the Swedish Foundation for Strategic Research (SSF). This work has been supported in part  
34 by Croatian Science Foundation under the project UIP-2019-04-1753. This work was also  
35 supported by Columbia University, School of Engineering and Applied Science; as well as  
36 Columbia University Medical Center, Department of Neurology and Institute for Genomic  
37 Medicine.

### 38 39 **Competing Interests**

40 The authors declare no conflicts of interest.

### 41 42 **Data Availability**

43 All data supporting the results drawn from experiments can be found in the paper and  
44 supplementary information. Raw data used for the plots found in Figures 2-5, and S1-S2 are  
45 available from the authors upon request.

## References

1. *Neuromodulation*. Krames, E., Peckham, P. H., Rezai, A., Eds. (Academic Press, London, 2009).
2. *Handbook of Bioelectronics*. Carrara, S., Iniewski, K., Eds. (Cambridge University Press, 2015).
3. Jastrzebska-Perfect, P. *et al.* Translational Neuroelectronics. *Adv. Funct. Mater.* (2020) doi.org/10.1002/adfm.201909165.
4. Lozano, A. M. *et al.* Deep brain stimulation: current challenges and future directions. *Nat. Rev. Neurol.* **15**, 148–160 (2019).
5. Chuang, A. T., Margo, C. E. & Greenberg, P. B. Retinal implants: a systematic review. *Br. J. Ophthalmol.* **98**, 852–856 (2014).
6. Johnson, R. L. & Wilson, C. G. A review of vagus nerve stimulation as a therapeutic intervention. *J. Inflamm. Res.* **11**, 203–213 (2018).
7. Ben-Menachem, E., Revesz, D., Simon, B. J. & Silberstein, S. Surgically implanted and non-invasive vagus nerve stimulation: A review of efficacy, safety and tolerability. *Eur. J. Neurol.* **22**, 1260–1268 (2015).
8. Caravaca, A. S. *et al.* An Effective Method for Acute Vagus Nerve Stimulation in Experimental Inflammation. *Front. Neurosci.* **13**, 877 (2019).
9. Birmingham, K. *et al.* Bioelectronic medicines : a research roadmap. *Nat. Rev. Drug Discov.* **13**, 399–400 (2014).
10. Acarón Ledesma, H. *et al.* An atlas of nano-enabled neural interfaces. *Nat. Nanotechnol.* **14**, 645–657 (2019).
11. Tanabe, Y. *et al.* High-performance wireless powering for peripheral nerve neuromodulation systems. *PLoS One* **12**, e0186698 (2017).
12. Larson, C. E. & Meng, E. A review for the peripheral nerve interface designer. *J. Neurosci. Methods* **332**, 108523 (2020).
13. Thimot, J. & Shepard, K. L. Bioelectronic devices: Wirelessly powered implants. *Nat. Biomed. Eng.* **1**, 0051 (2017).
14. Agrawal, D. R. *et al.* Conformal phased surfaces for wireless powering of bioelectronic microdevices. *Nat. Biomed. Eng.* **1**, 0043 (2017).
15. Lee, B. *et al.* An Implantable Peripheral Nerve Recording and Stimulation System for Experiments on Freely Moving Animal Subjects. *Sci. Rep.* **8**, 6115 (2018).
16. Hernandez-Reynoso, A. G. *et al.* Miniature electroparticle-cuff for wireless peripheral neuromodulation. *J. Neural Eng.* **16**, 046002 (2019).
17. Braun, U. *et al.* Magnetolectric materials for miniature, wireless neural stimulation at therapeutic frequencies. *Neuron* **107**, 1–13 (2020).
18. Cotero, V. *et al.* Noninvasive sub-organ ultrasound stimulation for targeted neuromodulation. *Nat. Commun.* **10**, 952 (2019).
19. Piech, D. K. *et al.* A wireless millimetre-scale implantable neural stimulator with ultrasonically powered bidirectional communication. *Nat. Biomed. Eng.* **4**, 207–222 (2020).
20. Jacques, S. L. Optical properties of biological tissues: A review. *Phys. Med. Biol.* **58**, 5007–5008 (2013).
21. Song, K. *et al.* Subdermal Flexible Solar Cell Arrays for Powering Medical Electronic Implants. *Adv. Healthc. Mater.* **5**, 1572–1580 (2016).

- 1 22. Haeberlin, A. *et al.* The first batteryless, solar-powered cardiac pacemaker. *Hear. Rhythm* **12**, 1317–1323 (2015).
- 2
- 3 23. Yun, S. H. & Kwok, S. J. J. Light in diagnosis, therapy and surgery. *Nat. Biomed. Eng.* **1**, 0008 (2017).
- 4
- 5 24. Park, S. *et al.* Self-powered ultra-flexible electronics via nano-grating-patterned organic photovoltaics. *Nature* **561**, 516–521 (2018).
- 6
- 7 25. Jiang, Y. *et al.* Rational design of silicon structures for optically controlled multiscale biointerfaces. *Nat. Biomed. Eng.* **2**, 508–521 (2018).
- 8
- 9 26. Scanziani, M. & Häusser, M. Electrophysiology in the age of light. *Nature* **461**, 930–939 (2009).
- 10
- 11 27. Richter, C. P. & Tan, X. Photons and neurons. *Hear. Res.* **311**, 72–88 (2014).
- 12 28. Shapiro, M. G., Homma, K., Villarreal, S., Richter, C.-P. & Bezanilla, F. Infrared light excites cells by changing their electrical capacitance. *Nat. Commun.* **3**, 736 (2012).
- 13
- 14
- 15 29. Jiang, Y. *et al.* Heterogeneous silicon mesostructures for lipid-supported bioelectric interfaces. *Nat. Mater.* **15**, 1023–1030 (2016).
- 16
- 17 30. Jiang, Y. & Tian, B. Inorganic semiconductor biointerfaces. *Nat. Rev. Mater.* **3**, 473–490 (2018).
- 18
- 19 31. Jiang, Y. *et al.* Nongenetic optical neuromodulation with silicon-based materials. *Nat. Protoc.* **14**, 1339–1376 (2019).
- 20
- 21 32. Sytnyk, M. *et al.* Cellular interfaces with hydrogen-bonded organic semiconductor hierarchical nanocrystals. *Nat. Commun.* **8**, 91 (2017).
- 22
- 23 33. Martino, N. *et al.* Photothermal cellular stimulation in functional bio-polymer interfaces. *Sci. Rep.* **5**, 8911 (2015).
- 24
- 25 34. Wang, L. *et al.* Photovoltaic retinal prosthesis: implant fabrication and performance. *J. Neural Eng.* **9**, 046014 (2012).
- 26
- 27 35. Ferlauto, L. *et al.* Design and validation of a foldable and photovoltaic wide-field epiretinal prosthesis. *Nat. Commun.* **9**, 992 (2018).
- 28
- 29 36. Mathieson, K. *et al.* Photovoltaic retinal prosthesis with high pixel density. *Nat. Photonics* **6**, 391–397 (2012).
- 30
- 31 37. Prévot, P. H. *et al.* Behavioural responses to a photovoltaic subretinal prosthesis implanted in non-human primates. *Nat. Biomed. Eng.* **4**, 172–180 (2019).
- 32
- 33 38. Hopkins, J. *et al.* Photoactive Organic Substrates for Cell Stimulation: Progress and Perspectives. *Adv. Mater. Technol.* **1800744**, 1800744 (2019).
- 34
- 35 39. Di Maria, F., Lodola, F., Zucchetti, E., Benfenati, F. & Lanzani, G. The evolution of artificial light actuators in living systems: from planar to nanostructured interfaces. *Chem. Soc. Rev.* (2018). doi:10.1039/C7CS00860K
- 36
- 37
- 38 40. Sytnyk, M. *et al.* Hydrogen-Bonded Organic Semiconductor Micro- And Nanocrystals: From Colloidal Syntheses to (Opto-)Electronic Devices. *J. Am. Chem. Soc.* **136**, 16522–16532 (2014).
- 39
- 40
- 41 41. Hunger, K. Toxicology and toxicological testing of colorants. *Rev. Prog. Color. Relat. Top.* **35**, 76–89 (2005).
- 42
- 43 42. Rand, D. *et al.* Direct Electrical Neurostimulation with Organic Pigment Photocapacitors. *Adv. Mater.* **30**, 1707292 (2018).
- 44
- 45 43. Jakešová, M. *et al.* Optoelectronic control of single cells using organic photocapacitors. *Sci. Adv.* **5**, eaav5265 (2019).
- 46

- 1 44. Ejneby, M. S. *et al.* Extracellular Photovoltage Clamp Using Conducting Polymer-  
2 Modified Organic Photocapacitors. *Adv. Mater. Technol.* **5**, 1900860 (2020).
- 3 45. Fortin, J. B. & Lu, T.-M. *Chemical Vapor Polymerization, The Growth and*  
4 *Properties of Parylene.* (Springer Science+Business Media, 2004).
- 5 46. Jacques, S. L. & Wang, L. MCML - Monte Carlo Modeling of Light Transport in  
6 Tissues. *Comput. Methods Programs Biomed.* **47**, 131–146 (1995).
- 7 47. Alerstam, E., Svensson, T. & Andersson-Engels, S. Parallel computing with  
8 graphics processing units for high-speed Monte Carlo simulation of photon  
9 migration. *J. Biomed. Opt.* **13**, 060504 (2008).
- 10 48. Bashkatov, A. N., Genina, E. A. & Tuchin, V. V. Optical properties of skin,  
11 subcutaneous, and muscle tissues: A review. *J. Innov. Opt. Health Sci.* **4**, 9–38  
12 (2011).
- 13 49. Cogan, S. F. Neural Stimulation and Recording Electrodes. *Annu. Rev. Biomed.*  
14 *Eng.* **10**, 275–309 (2008).
- 15 50. Derek, V. *et al.* Untangling Photofaradaic and Photocapacitive Effects in Organic  
16 Optoelectronic Stimulation Devices. *Front. Bioeng. Biotechnol.* **8**, 284 (2020).
- 17 51. Merrill, D. R., Bikson, M. & Jefferys, J. G. R. Electrical stimulation of excitable  
18 tissue: Design of efficacious and safe protocols. *J. Neurosci. Methods* **141**, 171–  
19 198 (2005).
- 20 52. Harnack, D. *et al.* The effects of electrode material, charge density and stimulation  
21 duration on the safety of high-frequency stimulation of the subthalamic nucleus in  
22 rats. *J. Neurosci. Methods* **138**, 207–216 (2004).
- 23 53. Schoen, I. & Fromherz, P. Activation of Na<sup>+</sup> channels in cell membrane by  
24 capacitive stimulation with silicon chip. *Appl. Phys. Lett.* **87**, 193901–193903  
25 (2005).
- 26 54. Jeppesen, C., Mortensen, N. A. & Kristensen, A. The effect of Ti and ITO  
27 adhesion layers on gold split-ring resonators. *Appl. Phys. Lett.* **97**, 2012–2015  
28 (2010).
- 29 55. Benck, J. D., Pinaud, B. A., Gorlin, Y. & Jaramillo, T. F. Substrate selection for  
30 fundamental studies of electrocatalysts and photoelectrodes: Inert potential  
31 windows in acidic, neutral, and basic electrolyte. *PLoS One* **9**, e107942 (2014).
- 32 56. Matarese, B., Mello, J. C. De, Feyen, P., Benfenati, F. & Preparation, A. S.  
33 Investigation of the stability and biocompatibility of commonly used electrode  
34 materials in organic neuro- optoelectronics. 1539–1542 (2015).
- 35 57. Selvakumaran, J., Hughes, M. P., Ewins, D. J. & Richards, P. R. Biocompatibility  
36 studies of materials used for chronically implantable microelectrodes. *1st Annu.*  
37 *Int. IEEE-EMBS Spec. Top. Conf. Microtechnologies Med. Biol. - Proc.* 521–525  
38 (2000). doi:10.1109/MMB.2000.893839
- 39 58. Ilic, B. & Craighead, H. G. Topographical patterning of chemically sensitive  
40 biological materials using a polymer-based dry lift off. *Biomed. Microdevices* **2**,  
41 317–322 (2000).
- 42 59. Yu, H., Xiong, W., Zhang, H., Wang, W. & Li, Z. A cable-tie-type parylene cuff  
43 electrode for peripheral nerve interfaces. *Proc. IEEE Int. Conf. Micro Electro*  
44 *Mech. Syst.* 9–12 (2014). doi:10.1109/MEMSYS.2014.6765560
- 45 60. Cobo, A. M. *et al.* Parylene-Based Cuff Electrode With Integrated Microfluidics  
46 for Peripheral Nerve Recording, Stimulation, and Drug Delivery. *J.*

- 1            *Microelectromechanical Syst.* **28**, 36–49 (2019).
- 2    61.    Günter, C., Delbeke, J. & Ortiz-Catalan, M. Safety of long-term electrical  
3            peripheral nerve stimulation: Review of the state of the art. *J. Neuroeng. Rehabil.*  
4            **16**, 13 (2019).
- 5    62.    Ayaz, M. *et al.* Sexual dependency of rat sciatic nerve fiber conduction velocity  
6            distributions. *Int. J. Neurosci.* **117**, 1537–1549 (2007).
- 7    63.    Koo, Y. S., Cho, C. S. & Kim, B. J. Pitfalls in using electrophysiological studies to  
8            diagnose neuromuscular disorders. *J. Clin. Neurol.* **8**, 1–14 (2012).
- 9    64.    Cameron, T. Safety and efficacy of spinal cord stimulation for the treatment of  
10           chronic pain: A 20-year literature review. *J. Neurosurg.* **100**, 254–267 (2004).
- 11   65.    Perryman, L. T. Spinal Cord Stimulation Costs and Complications can be reduced  
12           by Wireless Nanotechnology. A Review of Traditional Equipment Expenses  
13           Compared to Wireless Stimulation. *Am. J. Anesth. Clin. Res.* **4**, 19–24 (2018).
- 14   66.    Krook-Magnuson, E., Gelinás, J. N., Soltesz, I. & Buzsáki, G. Neuroelectronics  
15           and biooptics: Closed-loop technologies in neurological disorders. *JAMA Neurol.*  
16           **72**, 823–829 (2015).
- 17   67.    Edwards, C. A., Kouzani, A., Lee, K. H. & Ross, E. K. Neurostimulation Devices  
18           for the Treatment of Neurologic Disorders. *Mayo Clin. Proc.* **92**, 1427–1444  
19           (2017).
- 20   68.    Gutruf, P., Good, C. H. & Rogers, J. A. Perspective: Implantable optical systems  
21           for neuroscience research in behaving animal models—Current approaches and  
22           future directions. *APL Photonics* **3**, 120901 (2018).
- 23   69.    Lu, L. *et al.* Wireless optoelectronic photometers for monitoring neuronal  
24           dynamics in the deep brain. *Proc. Natl. Acad. Sci. U. S. A.* **115**, E1374–E1383  
25           (2018).
- 26   70.    Chang, J. H.-C., Lu, B. & Tai, Y.-C. Adhesion-enhancing surface treatments for  
27           parylene deposition. *16th Int. Solid-State Sensors, Actuators Microsystems Conf.*  
28           390–393 (2011).
- 29

Supplementary information for:

## A chronic photocapacitor implant for noninvasive neurostimulation with deep red light

Malin Silverå-Ejneby, Marie Jakešová, Jose J. Ferrero, Ludovico Migliaccio, Zifang Zhao, Magnus Berggren, Dion Khodagholy, Vedran Đerek,\* Jennifer Gelinas,\* Eric Daniel Głowacki\*

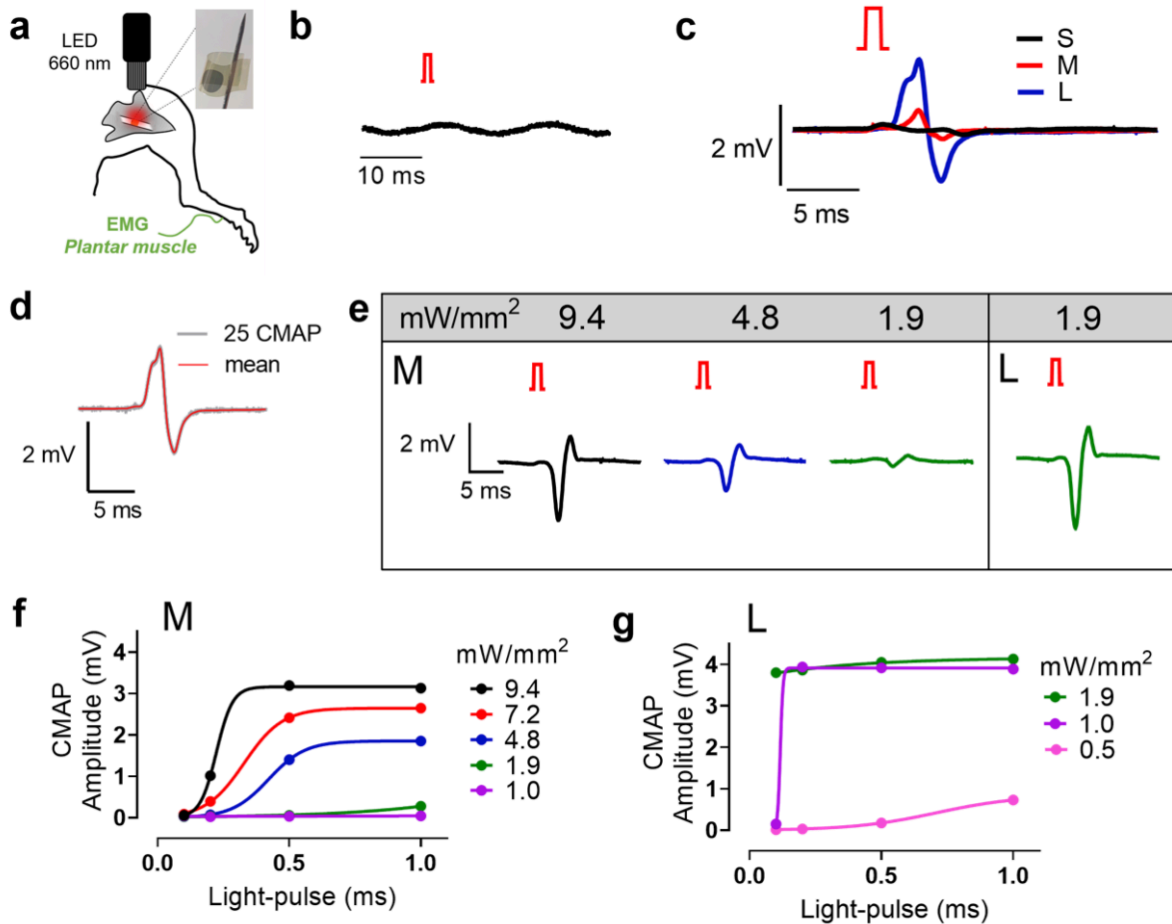

**Figure S1. | Acute sciatic nerve photostimulation registered in the Plantar muscle. a,** Schematic of the sciatic nerve stimulation experiment design for acute conditions, with inset photograph showing a free-standing device prior to implantation and EMG electrode inserted into the plantar muscle **b,** Illumination of a sham device, without the PN pixel (only gold on parylene C) gives no response or artefact. 1-ms light-pulses, 8.1 mW/mm<sup>2</sup> irradiation. **c,** Averaged evoked CMAPs in the plantar muscle (Rat #1) during 25 repetitive light-pulse stimulation (1 ms, 9.4 mW/mm<sup>2</sup> irradiation, 3 seconds in-between), for the respectively-sized OEPC devices. **d,** Highly reproducible repeated stimulation can be evidenced when 25 CMAPs are plotted on top of each other (in grey) for biceps femoris after repetitive stimulation with a M-sized OEPC device (Rat #1). 1-ms light-pulses, 9.4 mW/mm<sup>2</sup> irradiation, 3 seconds in-between. The averaged response is shown in red. **e,** Examples of CMAPs evoked at different light intensities, 1 ms pulses on M- and L-sized OEPC devices (Rat #2) **f,** Average plantar muscle CMAP amplitudes versus light-pulse length, at different light intensities. M-sized OEPC device. 25 pulses, 3 seconds in-between, for each condition. **g,** Average plantar muscle CMAP amplitudes versus light-pulse length, at different light intensities. L-sized OEPC device. 25 pulses, 3 seconds in-between, for each condition. CMAP amplitude saturates at lower intensities and pulse times for the L device compared with the M device.



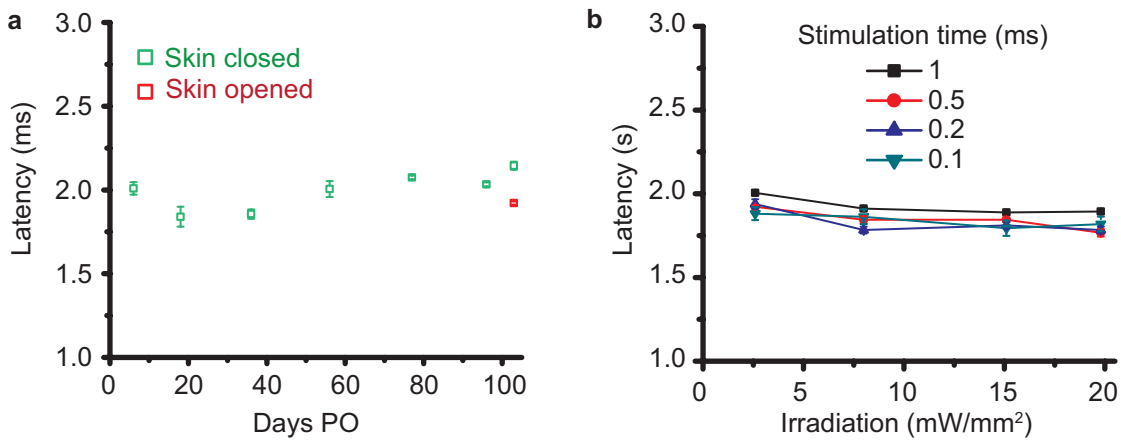

**Figure S2. | CMAP latency depends on stimulation strength. a,** CMAP latency over implantation period for a sample rat. Note that although CMAP latency increases after 60 days (green data points), this change is reversible by increasing light intensity through opening of skin superficial to CIP implantation site (red data point). This indicates that the apparent increase in latency is due to drop in device performance rather than detriment to the nerve. **b,** CMAP latency is reduced by increasing light intensity, further confirming that at long implantation times, device performance deterioration is connected with latency rise.

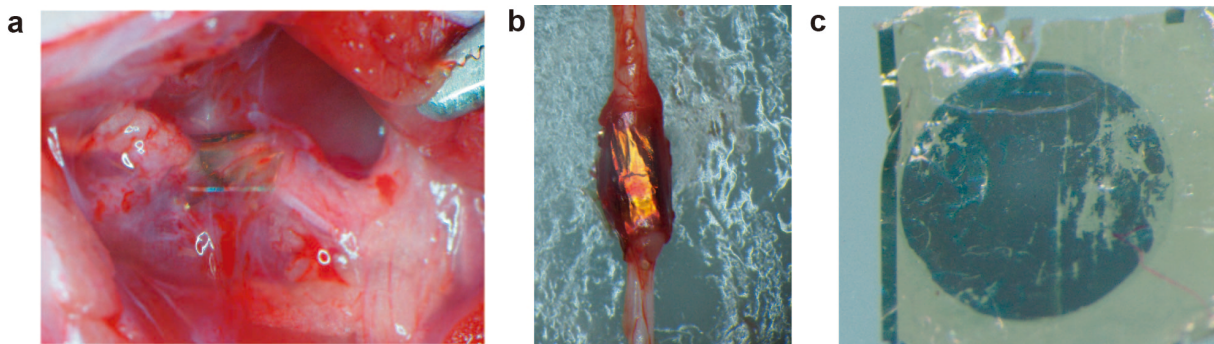

**Figure S3. | CIP explantation. a,** CIP affixed to nerve *in vivo* after 103 days post-implantation. **b,** The CIP remained wrapped around explanted sciatic nerve. **c,** Micrograph of the organic PN pigment layers from the explanted CIP device showing focal points of delamination of the organic semiconductor layers. The ITO-capped Au remains visually intact.

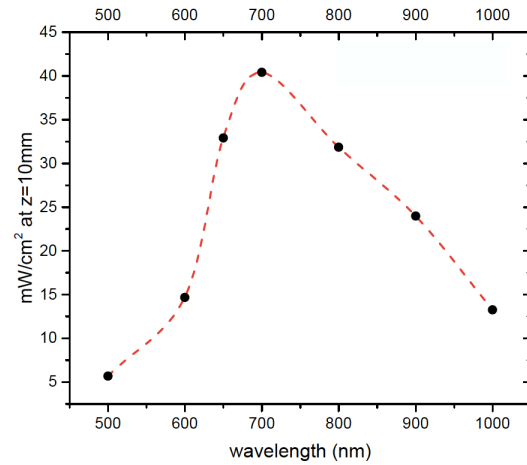

**Figure S4. | Wavelength dependence of optical power transmission through tissue.** Intensity at a fixed depth of  $z=10$  mm below the skin, calculated as a function of beam wavelength. A window between 650 – 800 nm affords the most optimal transmissivity through skin/fat/muscle tissue. The dark circles are points calculated based on available data parameters, while the red dashed line is a guide for the eye.
